# Supplementary material
Source: publisher site journal article supplement (https://www.dovepress.com/get_supplementary_file.php?f=409033.docx)
Supplement: Supplementary file 1 [file get_supplementary_file.php]

**Supplementary material**

**Table S1. Study inclusion and exclusion criteria**

| Study Inclusion and Exclusion Criteria | |
| --- | --- |
| Type of Study | Inclusion Criteria |
| In vivo | Animal studies of osseointegration outcomes after treatment with nanostructured 3D-printed Ti implants  The research period of animal experiment is more than 4 weeks |
|  | Exclusion Criteria |
| In vivo | Articles not written in English  Review and expert opinion articles, conference proceedings, and presentations  Ex vivo studies  Studies that did not evaluate the osseointegration capacity of nanopatterns  Studies that did not modify Ti surfaces with nanopatterns  3D-printed Ti implants were modified only by coating |

**Table S2. Checklist of the ARRIVE criteria reported by the included studies**

| **Studies** | **Ren B et al., 2021[35]** | **Cheng A et al., 2017[47]** | **Bandyopadhyay A et al., 2017[36]** | **Cohen DJ et al., 2016[42]** | **Hyzy SL et al., 2016[43]** | **Wang H et al., 2018[37]** | **Cohen DJ et al., 2017[44]** | **Mitra I et al., 2021[45]** | **Bose S et al., 2018[46]** |
| --- | --- | --- | --- | --- | --- | --- | --- | --- | --- |
| 1. Title | 1 | 1 | 1 | 1 | 1 | 1 | 1 | 1 | 1 |
| Abstract |  |  |  |  |  |  |  |  |  |
| 2. Species | 1 | 1 | 1 | 1 | 1 | 1 | 1 | 1 | 1 |
| 3. Key finding | 1 | 1 | 1 | 1 | 1 | 1 | 1 | 1 | 1 |
| Introduction |  |  |  |  |  |  |  |  |  |
| 4. Background | 1 | 1 | 1 | 1 | 1 | 1 | 1 | 1 | 1 |
| 5. Reason for animal models | 0 | 1 | 0 | 0 | 0 | 0 | 1 | 0 | 0 |
| 6. Objectives | 1 | 1 | 1 | 1 | 1 | 1 | 1 | 1 | 1 |
| Methods |  |  |  |  |  |  |  |  |  |
| 7. Ethical statement | 1 | 1 | 1 | 1 | 1 | 1 | 1 | 1 | 1 |
| 8. Study design | 1 | 1 | 1 | 1 | 1 | 1 | 1 | 1 | 1 |
| 9. Experimental procedures | 1 | 1 | 1 | 1 | 1 | 1 | 1 | 1 | 1 |
| 10. Experimental animals | 1 | 1 | 1 | 1 | 1 | 1 | 1 | 1 | 1 |
| 11. Accommodation and handling of animals | 1 | 1 | 1 | 0 | 0 | 0 | 1 | 0 | 1 |
| 12. Sample size | 1 | 1 | 1 | 1 | 1 | 1 | 1 | 1 | 1 |
| 13. Assignment of animals to experimental groups | 0 | 1 | 0 | 0 | 0 | 0 | 1 | 0 | 1 |
| 14.Anesthesia | 1 | 1 | 1 | 1 | 1 | 1 | 1 | 0 | 1 |
| 15. Statistical methods | 0 | 1 | 0 | 1 | 1 | 0 | 1 | 1 | 0 |
| Results |  |  |  |  |  |  |  |  |  |
| 16. Experimental results | 1 | 1 | 1 | 1 | 1 | 1 | 1 | 1 | 1 |
| 17. Results and estimation | 1 | 1 | 1 | 1 | 1 | 1 | 1 | 1 | 1 |
| Discussion |  |  |  |  |  |  |  |  |  |
| 18. Interpretation and scientific implications | 1 | 1 | 1 | 1 | 1 | 1 | 1 | 1 | 1 |
| 19. 3Rs reported | 0 | 1 | 0 | 0 | 0 | 0 | 1 | 0 | 0 |
| 20. Adverse events | 0 | 1 | 0 | 0 | 0 | 0 | 1 | 0 | 0 |
| 21. Studies limitations | 0 | 1 | 0 | 0 | 0 | 0 | 1 | 0 | 0 |
| 22. Generalization/applicability | 0 | 1 | 1 | 1 | 0 | 0 | 1 | 1 | 0 |
| 23. Funding | 1 | 1 | 1 | 1 | 0 | 1 | 1 | 1 | 1 |
| TOTAL, SCORE | 16 | 23 | 17 | 17 | 15 | 15 | 23 | 16 | 17 |
